# Supplementary material for: Predictive Equations Overestimate Resting Metabolic Rate in Young Chilean Women with Excess Body Fat
Source: MDPI journal article supplement (doi:10.3390/metabo13020188), 2023-01-27
Supplement: s1 [file s1]

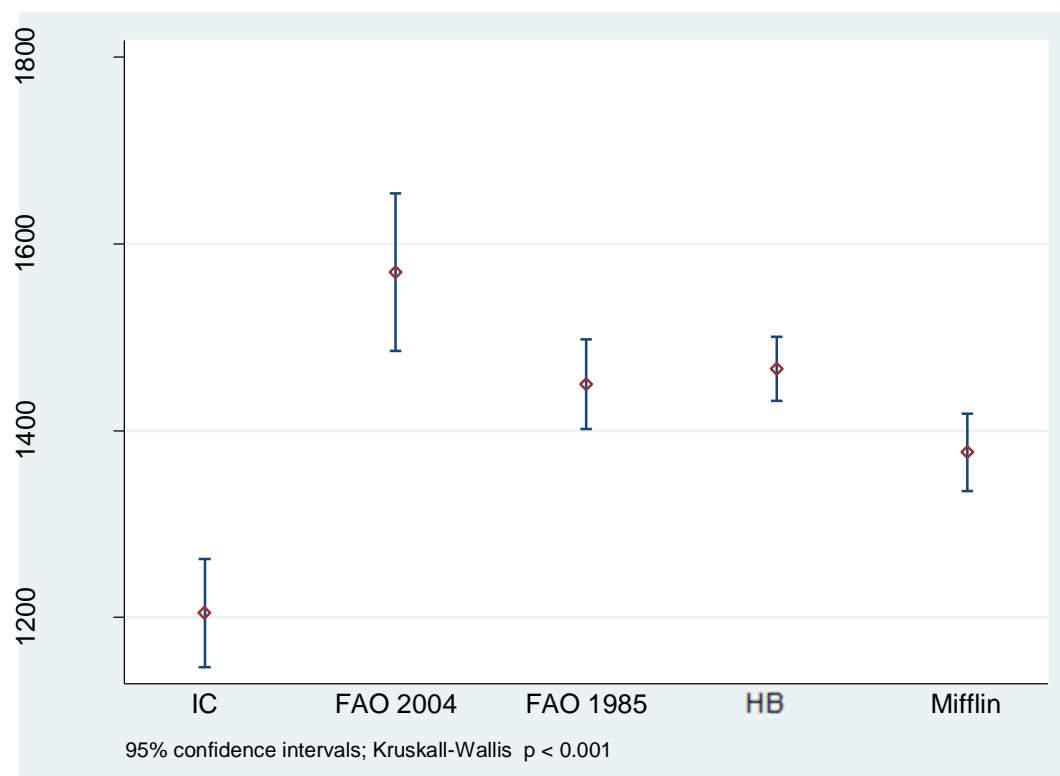

**Figure S1.** Resting metabolic rate (RMR) measured by indirect calorimetry (IC) vs. estimation by predictive equations in overweight women. IC: RMR IC; FAO 2004: FAO/WHO/UNU (2004); FAO 1985: FAO/WHO/UNU (1985); HB: Harris-Benedict; Mifflin: Mifflin-St Jeor.

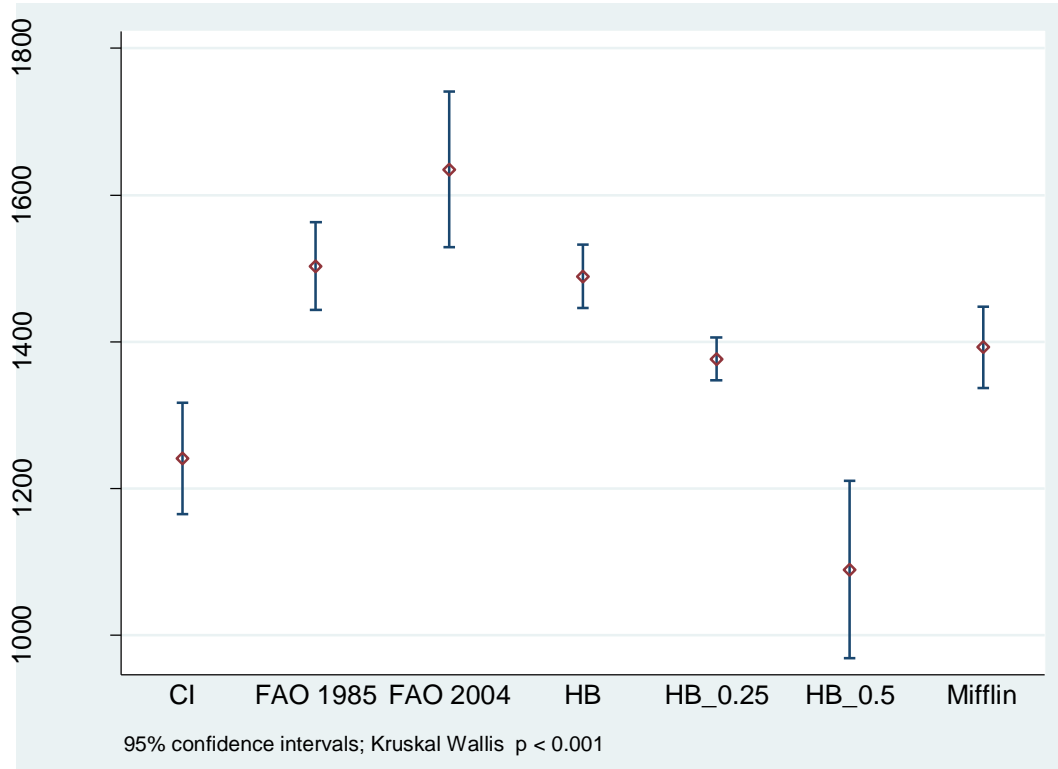

**Figure S2.** Resting metabolic rate (RMR) measured by indirect calorimetry (IC) vs. estimation by predictive equations in women with obesity. IC: RMR IC; FAO 2004: FAO/WHO/UNU (2004); FAO 1985: FAO/WHO/UNU (1985); HB: Harris-Benedict; H\_0.25: Harris-Benedict adjusted weight at 0.25; H\_0.5: Harris-Benedict adjusted weight at 0.5; Mifflin: Mifflin-St Jeor.
